# Supplementary material for: Synthesis and phase transformation of NaGdF4:Yb–Er thin films using electro-deposition method at moderate temperatures
Source: Royal Society of Chemistry journal article supplement (doi:10.1039/c8ce01340c), 2018-01-01
Supplement: c8ce01340c1.pdf [file c8ce01340c1.pdf]

## Synthesis and phase transformation of NaGdF<sub>4</sub>: Yb-Er thin films using electro-deposition method at moderate temperature

Hong JIA,<sup>a</sup> Yiping ZHOU,<sup>a</sup> Xue LI,<sup>a</sup> Yan LI,<sup>a</sup> Weiyang ZHANG,<sup>a</sup> Hongzhi FU,<sup>a</sup> Jianguo ZHAO,<sup>a</sup> Liuzhan PAN,<sup>a</sup> Xiaofeng LIU,<sup>\*b</sup> and Jianrong QIU,<sup>\*b,c</sup>

5

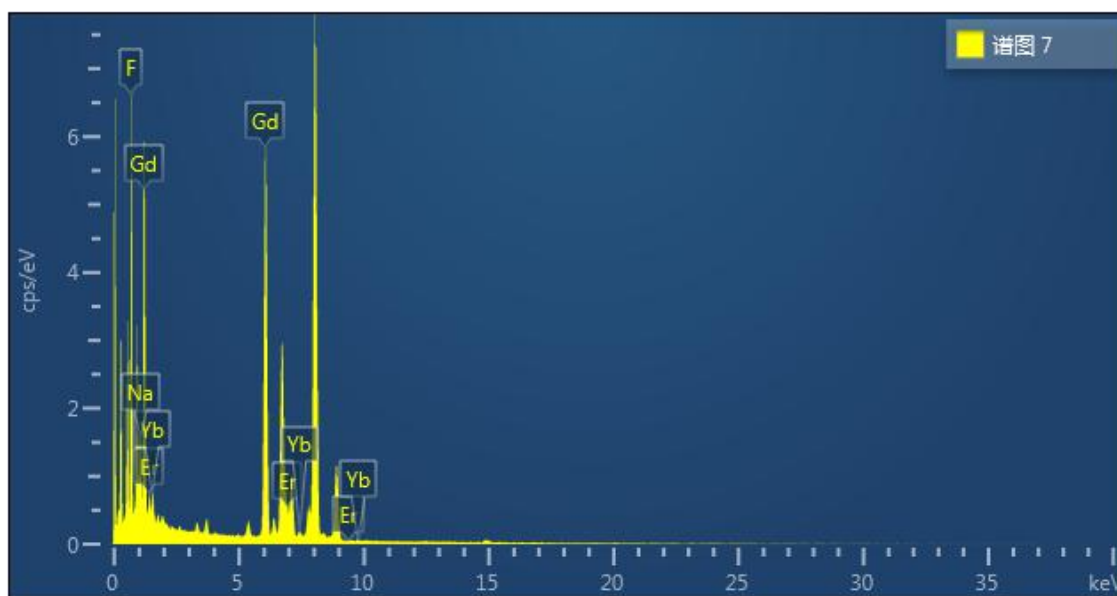

Figure S1. The energy dispersive X-ray analysis (EDX) of the  $\alpha$ -NaGdF<sub>4</sub>: Yb-Er.

10

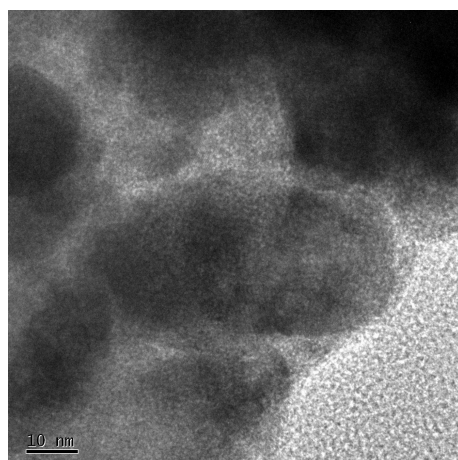

Figure S2. TEM images of the  $\beta$ -NaGdF<sub>4</sub>: Yb-Er thin films.

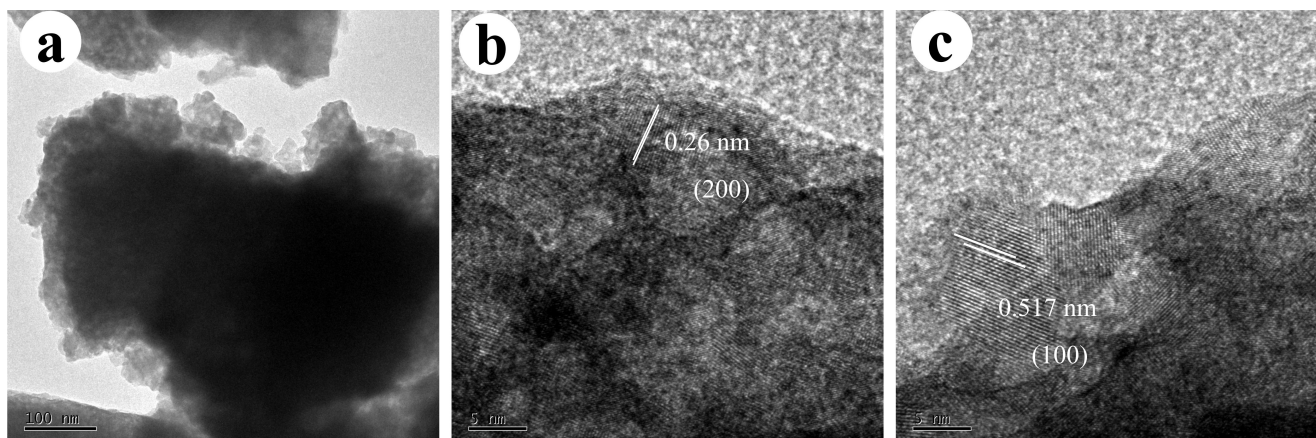

**Figure S3.** HRTEM images of the both  $\alpha$ - and  $\beta$ -NaGdF<sub>4</sub>: Yb-Er thin film: (a)  $\alpha$ - and  $\beta$ -NaGdF<sub>4</sub>: Yb-Er, (b) and (c) The corresponding HRTEM image.

5

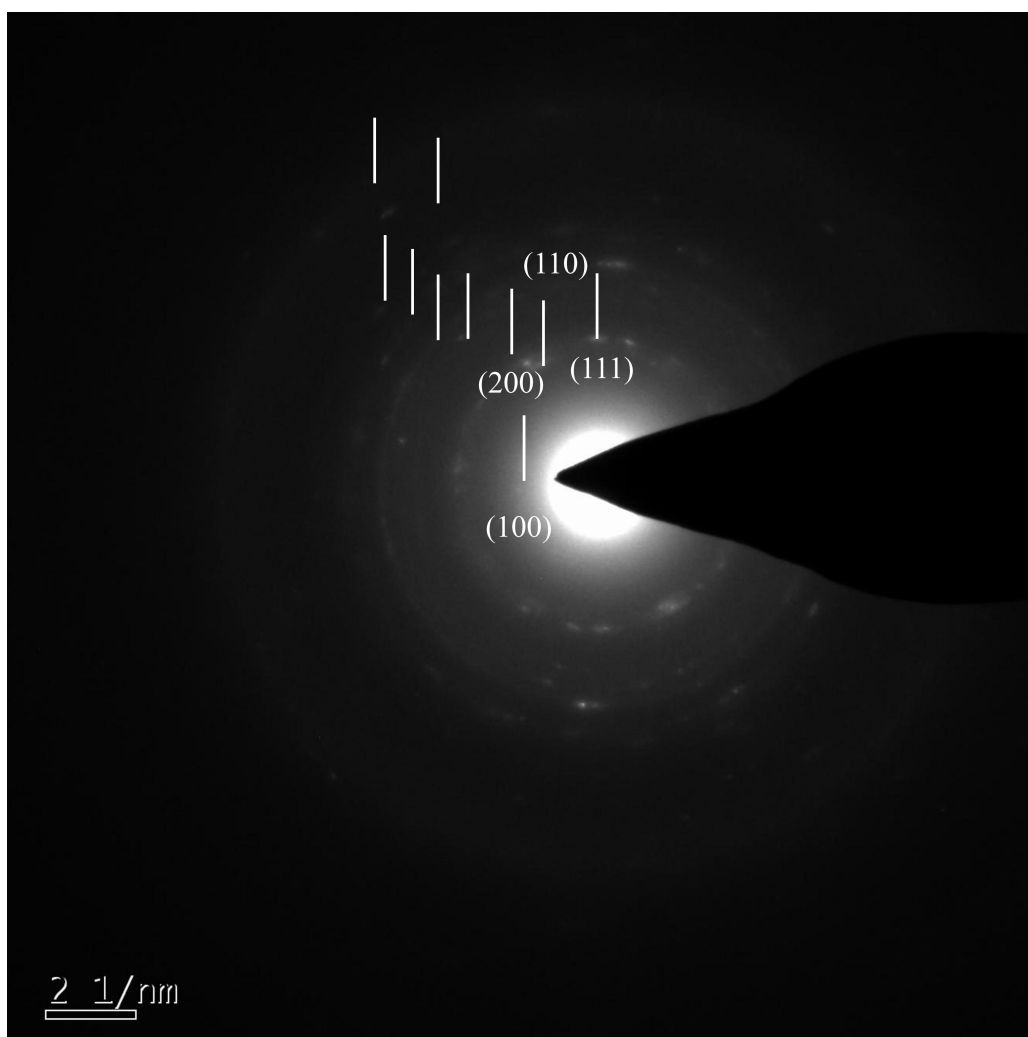

**Figure S4.** Selected electron diffraction pattern(SAED) of both both  $\alpha$ - and  $\beta$ -NaGdF<sub>4</sub>: Yb-Er.

10
